# Supplementary material for: Kallikrein-related peptidase 6 regulates epithelial-to-mesenchymal transition and serves as prognostic biomarker for head and neck squamous cell carcinoma patients
Source: PubMed Central journal article supplement (PMC4437453; doi:10.1186/s12943-015-0381-6), 2015-05-20

goat-anti-KLK6  
(AF2008; R&D)

rabbit-anti-KLK6  
(sc20264; Santa Cruz)

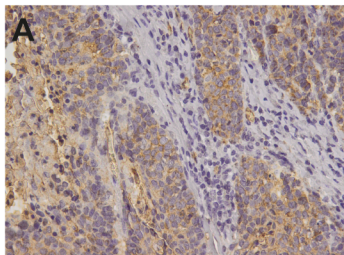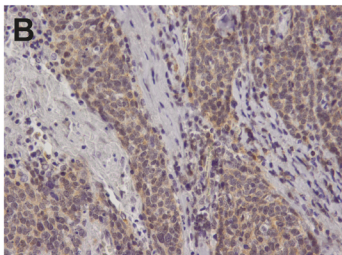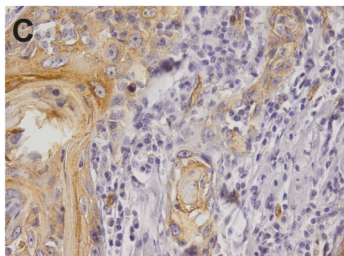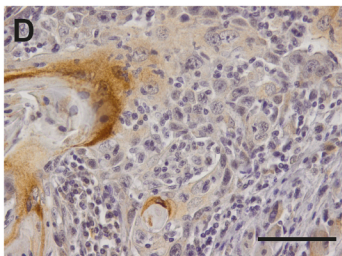

Supplement: 12943_2015_381_MOESM3_ESM.pdf [file 12943_2015_381_MOESM3_ESM.pdf]
