# Supplementary material for: Kallikrein-related peptidase 6 regulates epithelial-to-mesenchymal transition and serves as prognostic biomarker for head and neck squamous cell carcinoma patients
Source: Springer Nature journal article supplement (doi:10.1186/s12943-015-0381-6), 2015-05-19

**A**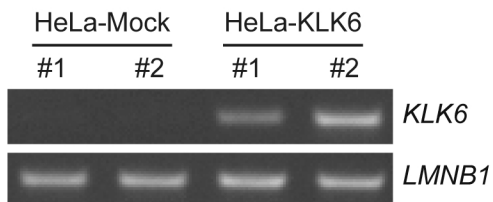**B**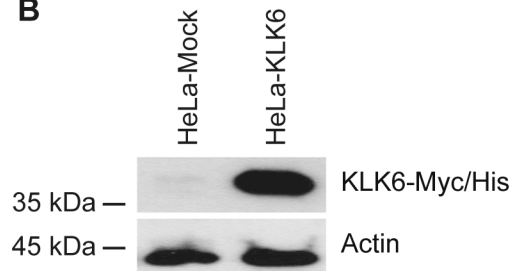**C**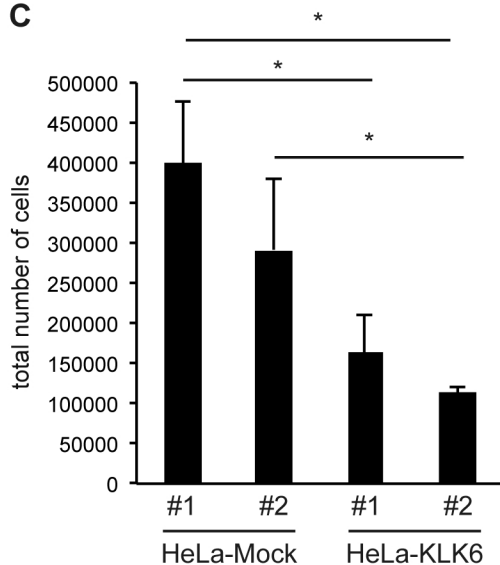**D**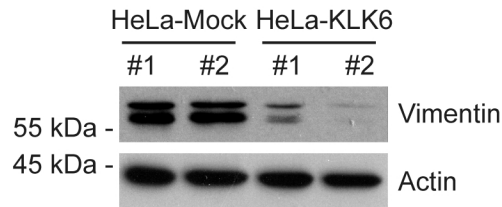

Supplement: MOESM1 [file 9763106]
