# Supplementary material for: Kallikrein-related peptidase 6 regulates epithelial-to-mesenchymal transition and serves as prognostic biomarker for head and neck squamous cell carcinoma patients
Source: Springer Nature journal article supplement (doi:10.1186/s12943-015-0381-6), 2015-05-19
Supplement: MOESM4 [file 9763106]

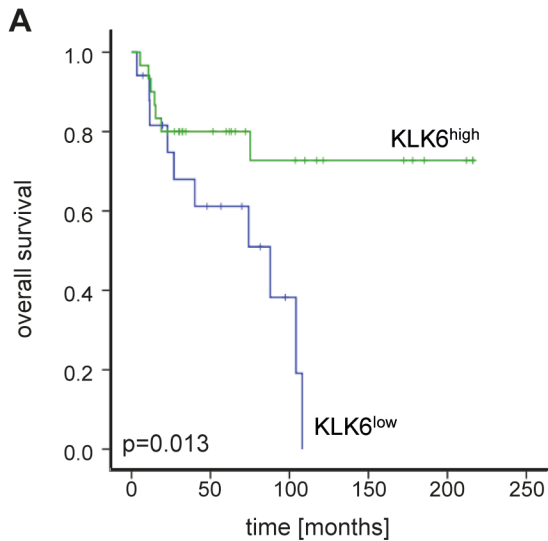

Numbers at risk

|                      |    |    |    |   |   |   |
|----------------------|----|----|----|---|---|---|
| KLK6 <sup>low</sup>  | 17 | 8  | 2  | 0 | 0 | 0 |
| KLK6 <sup>high</sup> | 30 | 17 | 10 | 6 | 3 | 0 |

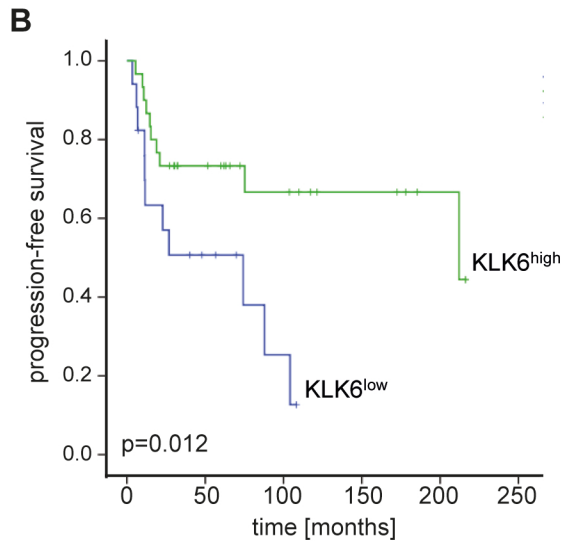

Numbers at risk

|                      |    |    |    |   |   |   |
|----------------------|----|----|----|---|---|---|
| KLK6 <sup>low</sup>  | 17 | 6  | 2  | 0 | 0 | 0 |
| KLK6 <sup>high</sup> | 30 | 17 | 10 | 6 | 3 | 0 |

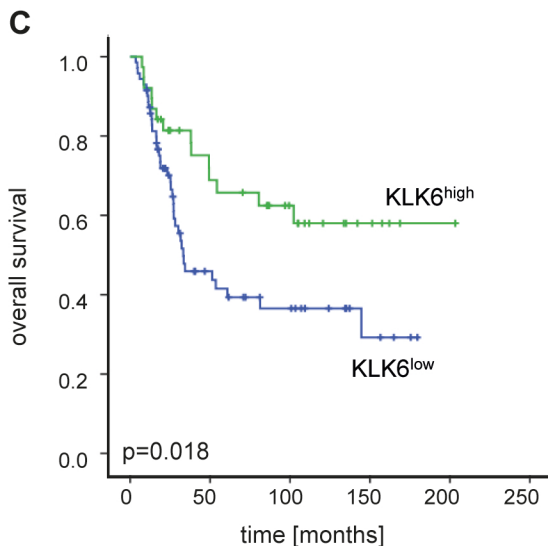

Numbers at risk

|                      |    |    |    |   |   |   |
|----------------------|----|----|----|---|---|---|
| KLK6 <sup>low</sup>  | 70 | 21 | 13 | 4 | 0 | 0 |
| KLK6 <sup>high</sup> | 37 | 22 | 14 | 5 | 1 | 0 |

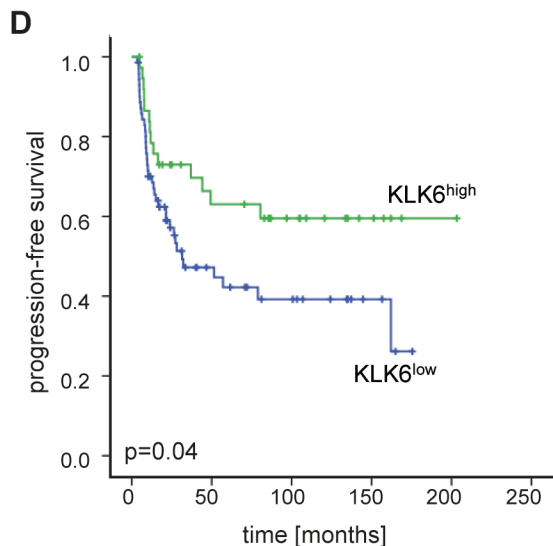

Numbers at risk

|                      |    |    |    |   |   |   |
|----------------------|----|----|----|---|---|---|
| KLK6 <sup>low</sup>  | 70 | 19 | 12 | 4 | 0 | 0 |
| KLK6 <sup>high</sup> | 37 | 19 | 12 | 5 | 1 | 0 |
